# Supplementary material for: Self-arrangement of nanoparticles toward crystalline metal oxides with high surface areas and tunable 3D mesopores
Source: PubMed Central journal article supplement (PMC4759599; doi:10.1038/srep21496), 2016-02-19
Supplement: srep21496-s1.pdf [file srep21496-s1.pdf]

Supporting Information for

## Self-Arrangement of Nanoparticles toward Crystalline Metal Oxides with High Surface Areas and Tunable 3D Mesopores

Hyung Ik Lee<sup>1</sup>, Yoon Yun Lee<sup>2</sup>, Dong-Uk Kang<sup>1</sup>, Kirim Lee<sup>1</sup>, Young-Uk Kwon<sup>1,2,\*</sup>, Ji Man Kim<sup>1,2\*</sup>

<sup>1</sup>Department of Chemistry, Sungkyunkwan University, Suwon, 440-746, Republic of Korea

<sup>2</sup>SKKU Advanced Institute of Nanotechnology, Sungkyunkwan University, Suwon, 440-746 Korea

\*E-mail: ywkwon@skku.edu (Y.-U. Kwon), jimankim@skku.edu (J. M. Kim)

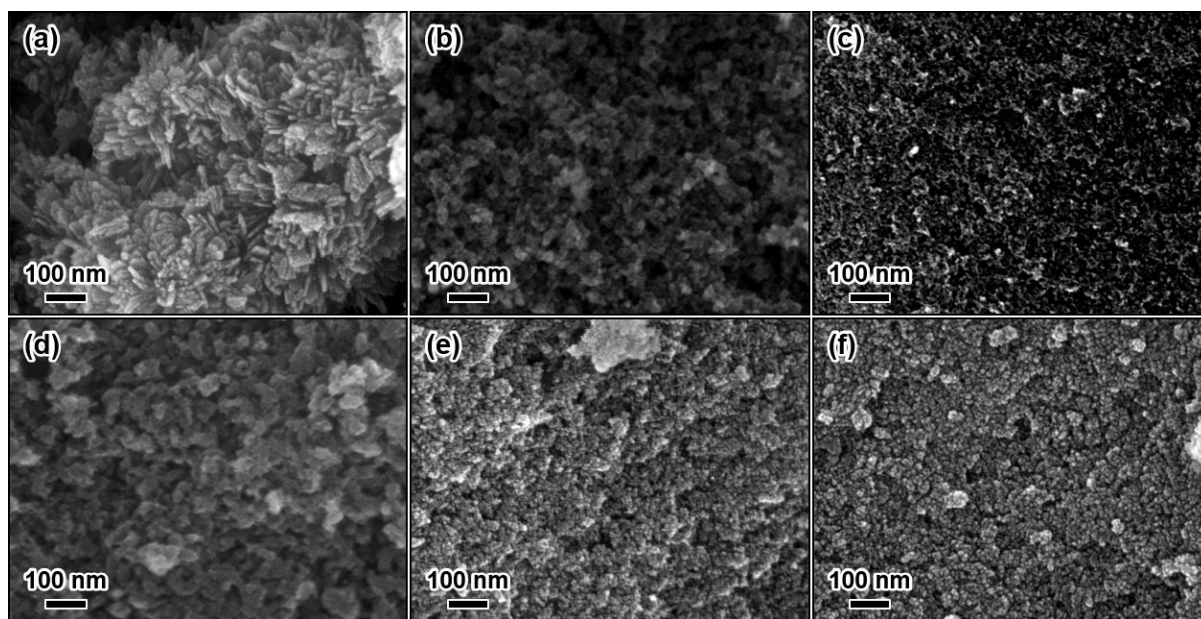

**Figure S1.** Scanning electron microscopy (SEM) images of MT-0 (a), MT-25 (b), MT-50 (c), MT-75 (d), MT-100 (e), and MT-200 (f).

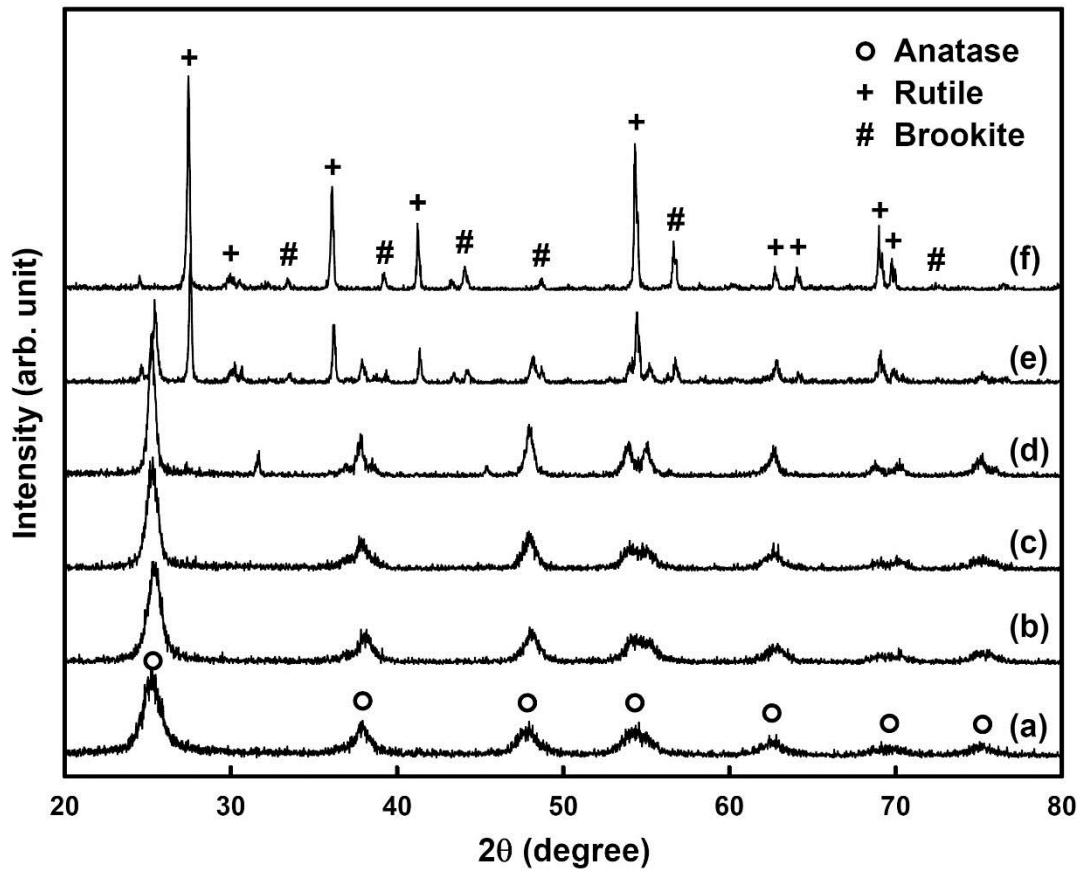

**Figure S2.** X-ray diffraction patterns of MT-100, before heat-treatment (a) and after heat treatment at 500°C (b), 600°C (c), 700°C (d), 800°C (e), and 900°C (f).

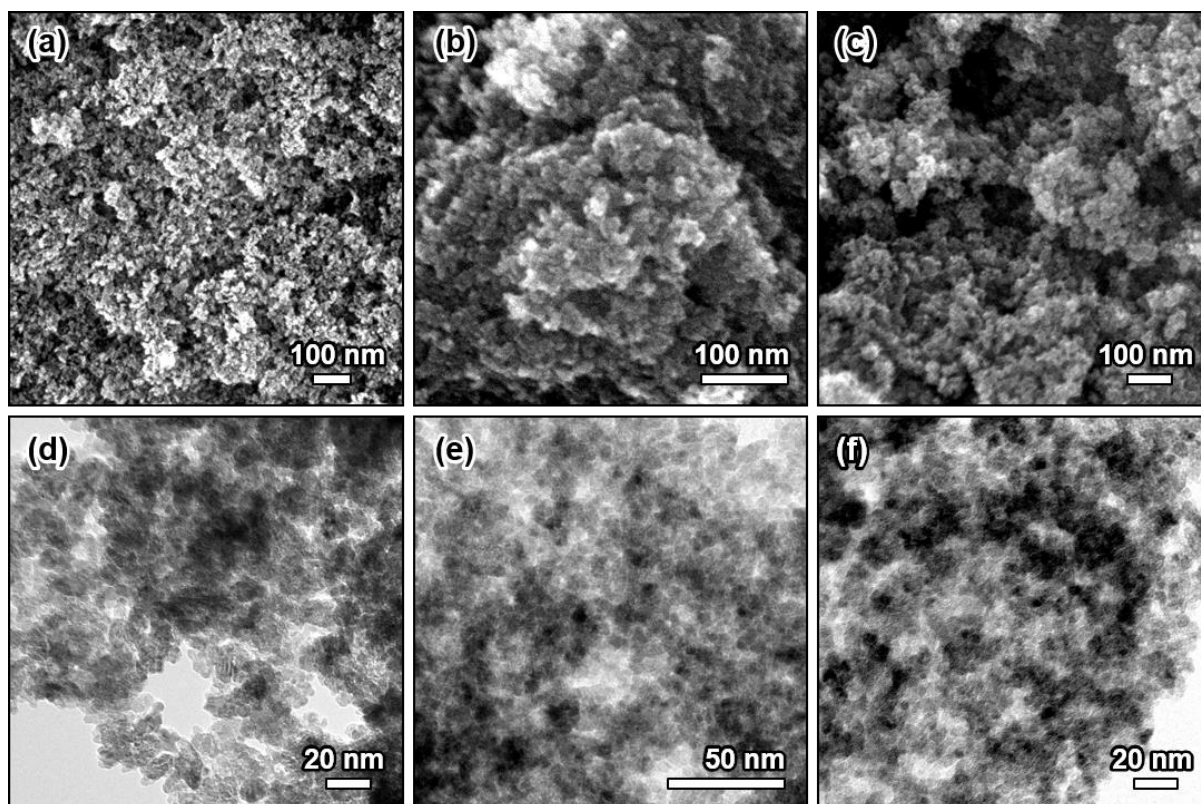

**Figure S3.** SEM (a-c) and TEM (d-f) images of mesoporous metal oxides composed of various wall materials: The wall materials are SnO<sub>2</sub> (a, d), TiO<sub>2</sub>-SnO<sub>2</sub> (b, e), and TiO<sub>2</sub>-ZrO<sub>2</sub> (c, f).

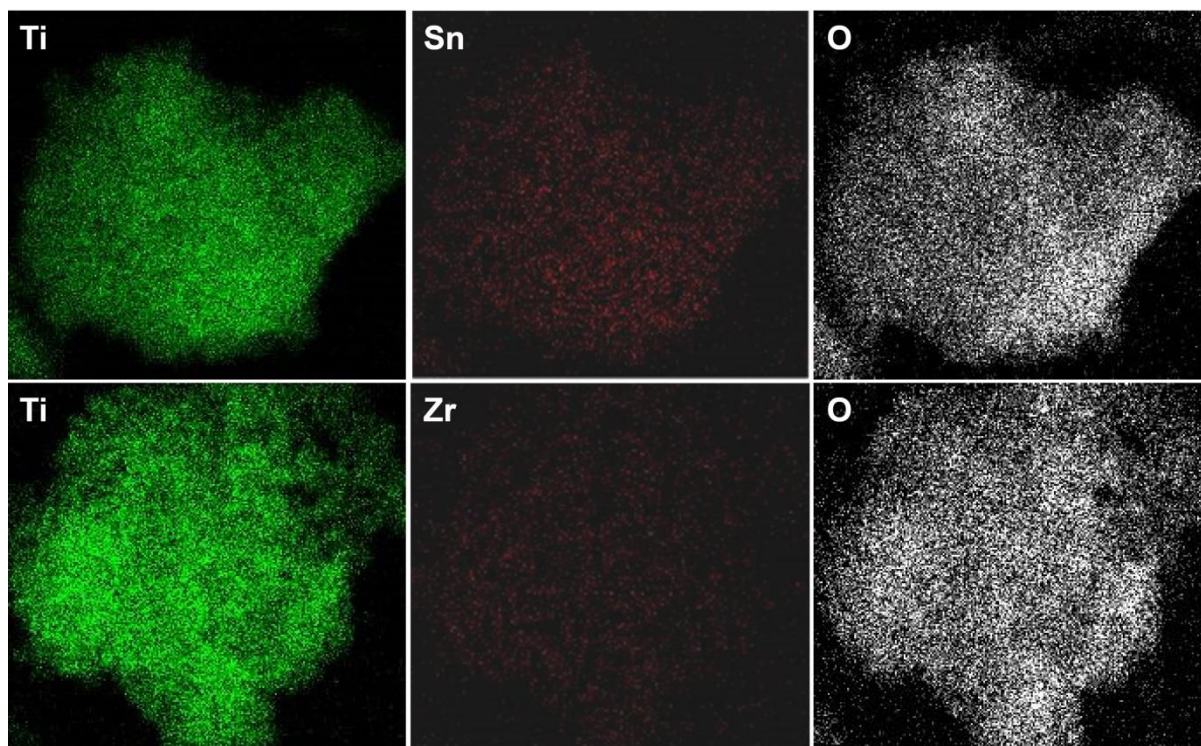

**Figure S4.** EDS elemental distribution images of mesoporous mixed oxides. Upper three images are on mesoporous TiO<sub>2</sub>-SnO<sub>2</sub> and the lower three images are on mesoporous TiO<sub>2</sub>-ZrO<sub>2</sub>.
